# Supplementary material for: RummaGEO: Automatic mining of human and mouse gene sets from GEO
Source: PubMed Central journal article supplement — Patterns (N Y). 2024 Oct 11;5(10):101072. doi: 10.1016/j.patter.2024.101072 (PMC11573963; doi:10.1016/j.patter.2024.101072), 2024-10-11
Supplement: mmc1.pdf [file mmc1.pdf]

**Patterns, Volume 5**

**Supplemental information**

**RummaGEO: Automatic mining of human  
and mouse gene sets from GEO**

**Giacomo B. Marino, Daniel J.B. Clarke, Alexander Lachmann, Eden Z. Deng, and Avi  
Ma'ayan**

# Supplemental Information

for

## RummaGEO: Automatic Mining of Human and Mouse Gene Sets from GEO

Giacomo B. Marino<sup>1</sup>, Daniel J. B. Clarke<sup>1</sup>, Eden Z. Deng<sup>1</sup>, Avi Ma'ayan<sup>1,\*</sup>

<sup>1</sup>Mount Sinai Center for Bioinformatics, Department of Pharmacological Sciences, Department of Artificial Intelligence and Human Health, Icahn School of Medicine at Mount Sinai, New York 10029, NY USA

\*To whom correspondence should be addressed:

Lead contact and corresponding author: [avi.maayan@mssm.edu](mailto:avi.maayan@mssm.edu)

Figure S1

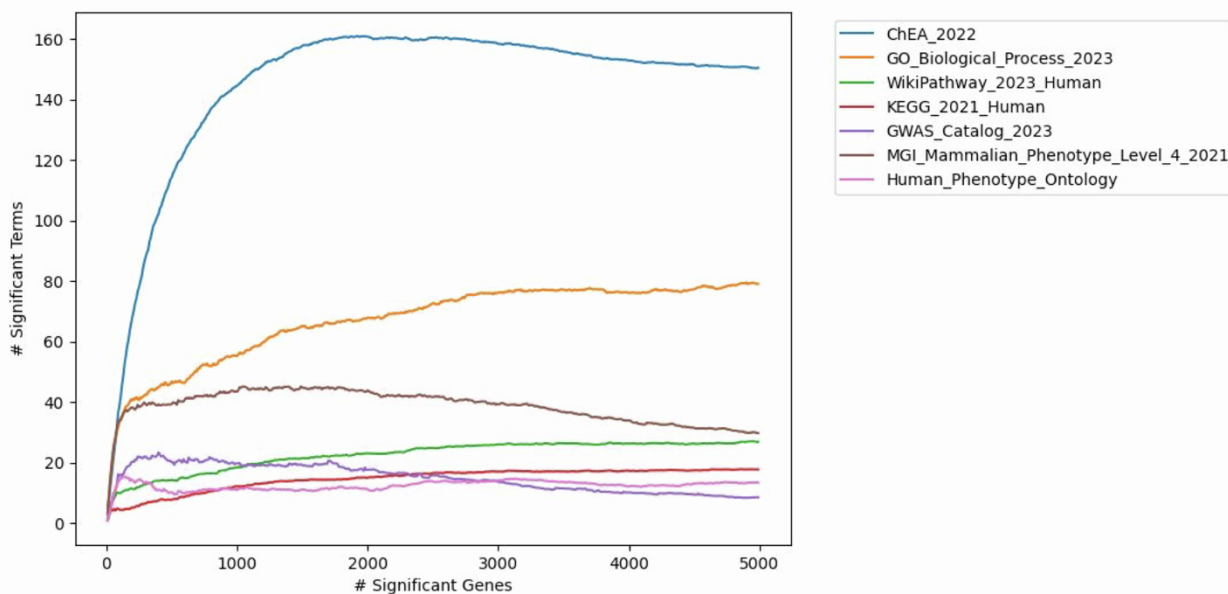

**Fig. S1** Significantly enriched terms from selected Enrichr libraries varying based on the cutoff number of genes.

Figure S2

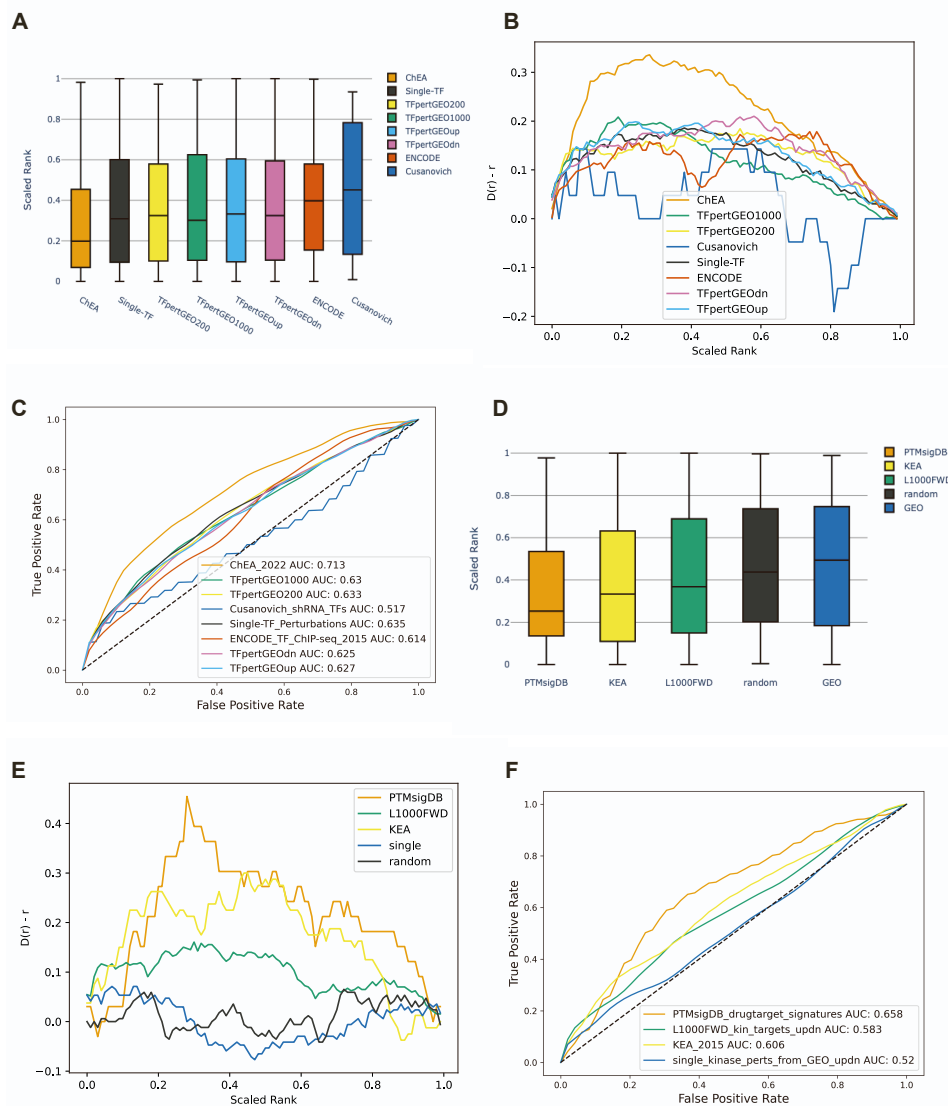

**Fig. S2 RummaGEO kinase and transcription factor libraries partial intersection benchmarking. A.** Scaled rank (0 highest rank, 1 lowest rank) for transcription factor benchmarking libraries as computed by the Fisher's exact test; **B.** Deviation of the cumulative distribution for scaled ranks of each transcription factor from uniform distribution (Kolmogorov-Smirnov test for goodness of fit compared to uniform distribution: ChEA 2022  $p = 3.83E-35$ ; TFpertGEO1000  $p = 1.07E-24$ ; TFpertGEO200  $p = 2.56E-21$ ; Cusanovich shRNA TFs  $p = 5.47E-01$ ; Single-TF Perturbations  $p = 2.01E-25$ ; ENCODE TF ChIP-seq 2015  $p = 1.01E-10$ ; TFpertGEOdn  $p = 4.33E-19$ ; TFpertGEOup  $p = 6.22E-21$ ); **C.** 5,000 bootstrapped curves with downsampled negative class were generated to compute mean receiver operating characteristic (ROC) curves and mean area under the ROC curves (AUC) for transcription factors. **D.** Scaled rank (0 highest rank, 1 lowest rank) for kinase benchmarking libraries as computed by Fisher's exact test; **E.** Deviation of the cumulative distribution for scaled ranks of each kinase from uniform distribution (Kolmogorov-Smirnov test for goodness of fit compared to uniform distribution: PTMsigDB drugtarget signatures  $p = 1.05E-03$ ; L1000FWD kin targets updn  $p = 1.06E-08$ ; KEA 2015  $p = 1.14E-03$ ; single kinase perts from GEO updn  $p = 1.50E-01$ ; random  $P = 5.59E-01$ ); **F.** 5,000 bootstrapped curves with downsampled negative class generated to compute mean receiver operating characteristic (ROC) curves and mean area under the ROC curves (AUC) for kinases.

Figure S3

Gene set search   PMC search   **Table title search**   Download   About   9,643 sets analyzed

Term:    Search gene sets   Query extracted gene set table titles to find relevant gene sets.

try an example: neuron, CRISPR, PBMC

After rummaging through 731,905 gene sets. Rummagene  found your search term in the table titles of 2 gene sets.

| Term                                                         | Gene Set                           |
|--------------------------------------------------------------|------------------------------------|
| PMC5534941-tp2017110x1.docx-6-Alzheimer_s_disease            | <a href="#">VIEW GENE SET (42)</a> |
| PMC5534941-tp2017110x1.docx-6-Alzheimer_s_disease_and_lipids | <a href="#">VIEW GENE SET (22)</a> |

1

Fig. S3 Alzheimer's gene set on Rummagene (use case 1).

Figure S4

Gene set search   PubMed search   Metadata search   Download   User Manual   About   4,502 sets analyzed

Input: [Gene set \(42 genes\)](#)

Matching Gene Sets   Common Terms in Matching Gene Sets   Enrichr Terms

After rummaging through 135,264 human gene sets. RummaGEO  found 11,288 statistically significant matches.

Minimum Silhouette Score: -1     Hypothesis Generation 

| GEO Series | PMID     | Title                                                                                                                 | Condition 1                                                                                                             | Condition 2                                                                                                  | Direction | Platform  | Date       | Gene Set Size | Overlap | Odds | PValue   | AdjPValue | Silhouette Score | Hypothesis                                                                            | Enrichr Terms                                                                         |
|------------|----------|-----------------------------------------------------------------------------------------------------------------------|-------------------------------------------------------------------------------------------------------------------------|--------------------------------------------------------------------------------------------------------------|-----------|-----------|------------|---------------|---------|------|----------|-----------|------------------|---------------------------------------------------------------------------------------|---------------------------------------------------------------------------------------|
| GSE103510  | N/A      | Pharmacologic inhibition of STAT5 in AML                                                                              | molm 13 ac 4 130 cd3 cd4 + cd13 (+) cd14 cd15 cd19 cd33 cd34 cycd68 hla dr ft13 itd mll af9 (5 ðµm) human aml cell line | mv4 11 ac 4 130 cd3 cd4 + cd5 cd8 cd10 cd14 cd15 cd19 cd33 cd34 ft13 itd mll af4 (5 ðµm) human aml cell line | Up        | GPL111154 | 2018-09-03 | 1755          | 19      | 15.9 | 9.23e-19 | 1.27e-13  | 0.92             |  |  |
| GSE103510  | N/A      | Pharmacologic inhibition of STAT5 in AML                                                                              | molm 13 dms0 cd3 cd4 + cd13 (+) cd14 cd15 cd19 cd33 cd34 cycd68 hla dr ft13 itd mll af9 human aml cell line             | mv4 11 ac 4 130 cd3 cd4 + cd5 cd8 cd10 cd14 cd15 cd19 cd33 cd34 ft13 itd mll af4 (5 ðµm) human aml cell line | Up        | GPL111154 | 2018-09-03 | 1796          | 18      | 14.7 | 3.78e-17 | 2.61e-12  | 0.92             |  |  |
| GSE221327  | 37063293 | Multi-omics analyses reveal ClpP activators disrupt essential mitochondrial pathways in triple-negative breast cancer | wt sum159 onc201 (1 hr) (bio. rep. time 1 hour cell line triple negative breast cancer 10 um                            | clpp ko sum159 onc201 (1 hr) (bio. rep. time 1 hour cell line triple negative breast cancer 10 um            | Up        | GPL24676  | 2023-04-01 | 1353          | 15      | 16.3 | 6.88e-15 | 3.16e-10  | -0.36            |  |  |
| GSE103510  | N/A      | Pharmacologic inhibition of STAT5 in AML                                                                              | mv4 11 dms0 cd3 cd4 + cd5 cd8 cd10 cd14 cd15 cd19 cd33 cd34 ft13 itd mll af4 human aml cell line                        | molm 13 dms0 cd3 cd4 + cd13 (+) cd14 cd15 cd19 cd33 cd34 cycd68 hla dr ft13 itd mll af9 human aml cell line  | Down      | GPL111154 | 2018-09-03 | 1203          | 14      | 17.1 | 3.40e-14 | 1.17e-9   | 0.92             |  |  |

Fig. S4 Results of submitting the Alzheimer's gene set from Rummagene on RummaGEO (use case 1).

Figure S5

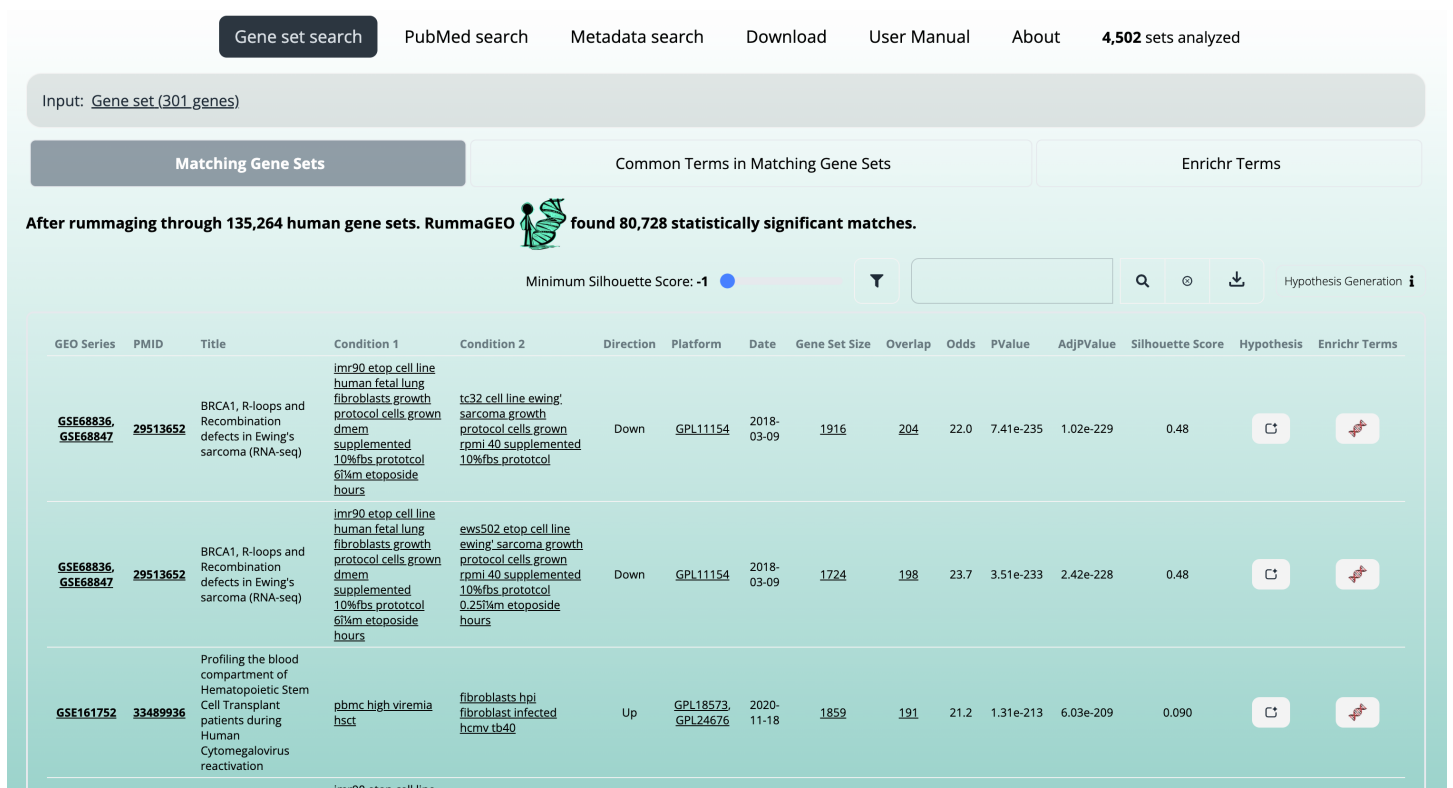

Fig. S5 Results from submitting SenoRanger gene set on RummaGEO (use case 2).
